# Supplementary material for: Associations between Tobacco Smoking and Self-Reported SARS-CoV-2/COVID-19 Infections, Disease Severity, and Duration in the German Population
Source: Atypon-hosted journal article supplement (doi:10.1024/0939-5911/a000858), 2024-04-01
Supplement: 0939-5911_a000858_esm1.pdf [file 0939-5911_a000858_esm1.pdf]

## Electronic Supplementary Material

**ESM 1.** Responses to the outcome corona symptom duration in subsample of people with a corona infection and symptoms of any degree (n=724)

| <b>a) "How long ago was your corona disease?"</b>                                  | <b>N (%)</b> |
|------------------------------------------------------------------------------------|--------------|
| 1. In the past month                                                               | 74 (10.3)    |
| 2. 1-3 months                                                                      | 152 (21.1)   |
| 3. 3-6 months                                                                      | 177 (24.6)   |
| 4. 6-9 months                                                                      | 143 (19.9)   |
| 5. 9-12 months                                                                     | 116 (16.1)   |
| 6. Longer than 12 months                                                           | 55 (7.6)     |
| 7. No response                                                                     | 3 (0.4)      |
| <b>b) "How long did the complaints of your corona disease last approximately?"</b> | <b>N (%)</b> |
| 1. Until today                                                                     | 74 (10.3)    |
| 2. 1 month                                                                         | 449 (62.4)   |
| 3. 1-3 months                                                                      | 107 (14.9)   |
| 4. 3-6 months                                                                      | 27 (3.8)     |
| 5. 6-9 months                                                                      | 9 (1.3)      |
| 6. 9-12 months                                                                     | 3 (0.4)      |
| 7. Longer than 12 months                                                           | 3 (0.4)      |
| 8. No response                                                                     | 48 (6.7)     |
| <b>c) Metric scale of corona symptom duration based on responses to a) and b)†</b> | <b>N (%)</b> |
| 1. 0.5 months                                                                      | 66 (9.8)     |
| 2. 1 month                                                                         | 409 (60.9)   |
| 3. 1.5 months                                                                      | 120 (17.9)   |
| 4. 4.5 months                                                                      | 42 (6.3)     |
| 5. 7.5 months                                                                      | 20 (3.0)     |
| 6. 10.5 months                                                                     | 7 (1.0)      |
| 7. 12 months or longer                                                             | 8 (1.2)      |
| 8. Missing                                                                         | 52 (7.2)     |

*Notes.* †N.B. The two variables a) and b) were combined into the following output parameters for symptom duration, resulting in a metric scale ranging from 0.5 to 12 months:

## Electronic Supplementary Material

| When did disease start? | How long did complaints last? |      |      |      |      |       |       |      |  |
|-------------------------|-------------------------------|------|------|------|------|-------|-------|------|--|
|                         | today                         | 1m   | 1-3m | 3-6m | 6-9m | 9-12m | >12m  | n.r. |  |
| <1m                     | 0.5m                          | 0.5m | 1m   | 1m   | 1m   | 1m    | 1m    | n.r. |  |
| 1-3m                    | 1.5m                          | 1m   | 1.5m | 3m   | 3m   | 3m    | 3m    | n.r. |  |
| 3-6m                    | 4.5m                          | 1m   | 1.5m | 4.5m | 4.5m | 4.5m  | 4.5m  | n.r. |  |
| 6-9m                    | 7.5m                          | 1m   | 1.5m | 4.5  | 7.5m | 7.5m  | 7.5m  | n.r. |  |
| 9-12m                   | 10.5m                         | 1m   | 1.5m | 4.5  | 7.5m | 10.5m | 10.5m | n.r. |  |
| >12m                    | 12m                           | 1m   | 1.5m | 4.5  | 7.5m | 10.5m | 12m   | n.r. |  |
| n.r.                    | n.r.                          | 1m   | 1.5m | 4.5  | 7.5m | 10.5m | 12m   | n.r. |  |

Notes. M = month. N.r. = no response (missing). Output parameters marked red indicate invalid combinations which have been corrected (imputed).
