# Supplementary material for: Associations between Tobacco Smoking and Self-Reported SARS-CoV-2/COVID-19 Infections, Disease Severity, and Duration in the German Population
Source: Atypon-hosted journal article supplement (doi:10.1024/0939-5911/a000858), 2024-04-01
Supplement: 0939-5911_a000858_esm2.pdf [file 0939-5911_a000858_esm2.pdf]

# Electronic Supplementary Material

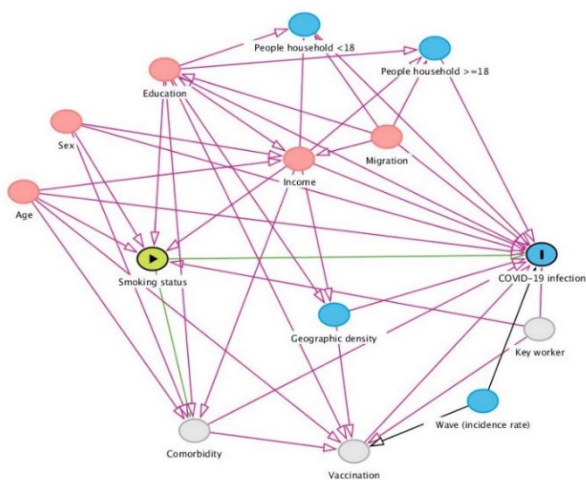

(a) outcome: infection

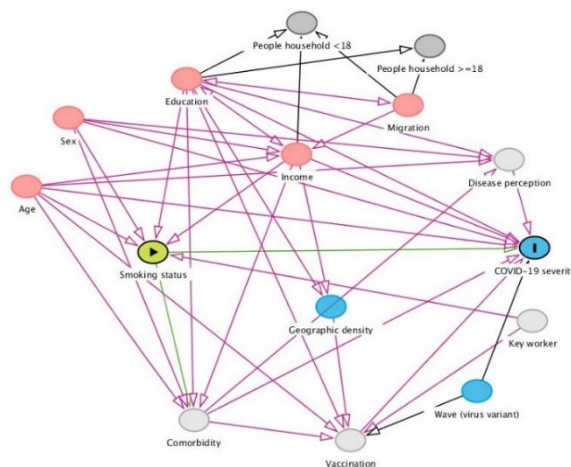

(b) outcome: severity

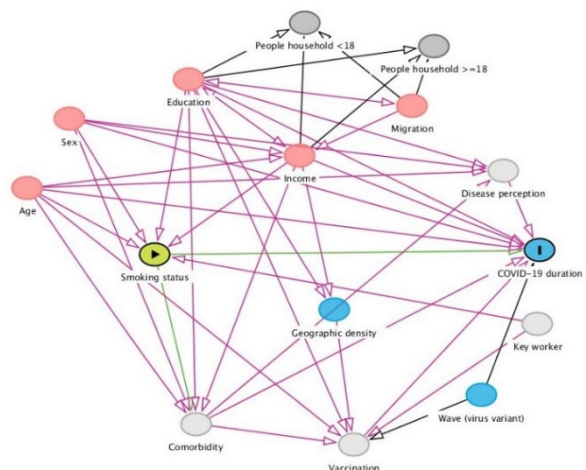

(c) outcome: duration

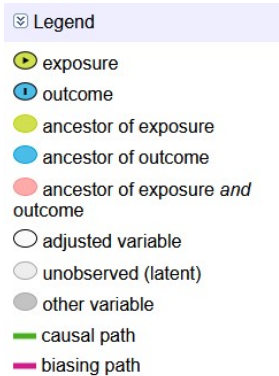

**ESM 2.** Causal diagrams indicating the hypothetical associations between exposure, the outcomes – (a) corona infection, (b) symptom severity, (c) symptom duration – and potential confounding factors.

The diagrams were drawn using the website <http://dagitty.net> (Textor, J., van der Zander, B., Gilthorpe, M. S., Liškiewicz, M., & Ellison, G. T. (2017). Robust causal inference using directed acyclic graphs: The R package ‘dagitty’. *International Journal of Epidemiology*, 45(6), 1887–1894. <https://doi.org/10.1093/ije/dyw341>)
