# Supplementary material for: Associations between Tobacco Smoking and Self-Reported SARS-CoV-2/COVID-19 Infections, Disease Severity, and Duration in the German Population
Source: Atypon-hosted journal article supplement (doi:10.1024/0939-5911/a000858), 2024-04-01
Supplement: 0939-5911_a000858_esm3.pdf [file 0939-5911_a000858_esm3.pdf]

## Electronic Supplementary Material

### ESM 3. Responses to the outcome corona infection in total sample (n=16,028)

| <b>“Have you ever been tested for the corona virus by healthcare personnel (no self-test)?”</b> | <b>N (%)</b>  |
|-------------------------------------------------------------------------------------------------|---------------|
| 1. Yes, and I have tested positive at least once                                                | 872 (5.4)     |
| 2. Yes, but I have always tested negative                                                       | 10,932 (68.2) |
| 3. Yes, but I am still waiting for the result                                                   | 30 (0.2)      |
| 4. No, I have never been tested for the corona virus                                            | 4,117 (25.7)  |
| 5. I don't know if I have ever been tested for the corona virus                                 | 77 (0.5)      |
| 6. No response                                                                                  | 0             |
