# Supplementary material for: Associations between Tobacco Smoking and Self-Reported SARS-CoV-2/COVID-19 Infections, Disease Severity, and Duration in the German Population
Source: Atypon-hosted journal article supplement (doi:10.1024/0939-5911/a000858), 2024-04-01
Supplement: 0939-5911_a000858_esm4.pdf [file 0939-5911_a000858_esm4.pdf]

## Electronic Supplementary Material

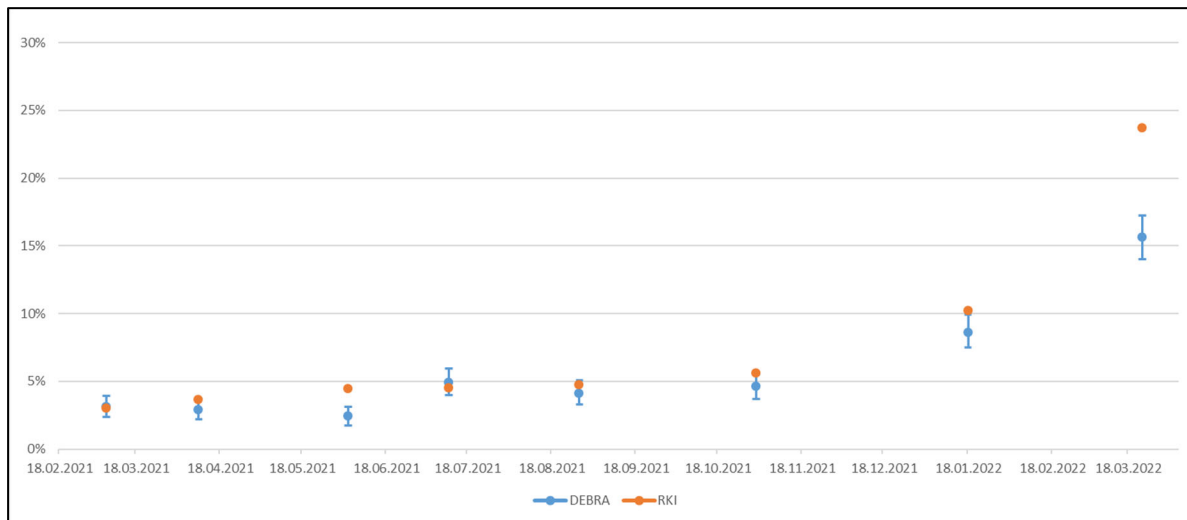

**ESM 4.** Weighted lifetime prevalence of corona infection rates at different time points of the DEBRA waves estimated with DEBRA data (blue dots, with 95% CIs) compared with official cumulative corona infection rates from the Robert Koch Institute (RKI, orange dots).

The time points were defined as the days at which at least 50% of the DEBRA respondents had been interviewed during the time span of field work of the respective waves 28-35. The RKI rates were calculated by dividing the cumulative number of COVID-19 cases at the respective time point (as reported on <http://corona.rki.de>) by the total German population in the same year (as reported on <https://www.destatis.de>). The difference between the DEBRA estimated and the RKI figure at the time point of the last wave may partly be explained by the fact that the RKI figure includes people who have been infected more than one time. Such multiple infections have constantly increased since the start of the pandemic.
