# Supplementary material for: Associations between Tobacco Smoking and Self-Reported SARS-CoV-2/COVID-19 Infections, Disease Severity, and Duration in the German Population
Source: Atypon-hosted journal article supplement (doi:10.1024/0939-5911/a000858), 2024-04-01
Supplement: 0939-5911_a000858_esm5.pdf [file 0939-5911_a000858_esm5.pdf]

## Electronic Supplementary Material

**ESM 5.** Responses to the outcome corona symptom severity in subsample of people with a corona infection (n=872)

| <b>“The main symptoms of the corona virus are, for example, fever over 38 degrees; a new, persistent cough or a cold; head and limb pain; or disturbed smell and taste. When you think about it, how severe were the symptoms of your corona disease?”</b> | <b>N (%)</b> |
|------------------------------------------------------------------------------------------------------------------------------------------------------------------------------------------------------------------------------------------------------------|--------------|
| 1. I had no symptoms or the test result was probably wrong                                                                                                                                                                                                 | 148 (17.0)   |
| 2. I only had mild symptoms                                                                                                                                                                                                                                | 462 (53.0)   |
| 3. I had severe symptoms, but could cure myself at home                                                                                                                                                                                                    | 233 (26.7)   |
| 4. I had severe symptoms and had to get treatment in a hospital                                                                                                                                                                                            | 19 (2.2)     |
| 5. In the hospital I needed intensive care treatment or had to be intubated                                                                                                                                                                                | 6 (0.7)      |
| 6. No response                                                                                                                                                                                                                                             | 4 (0.5)      |

*Notes.* Responses 1-2 indicating low symptom severity and 3-5 high symptom severity.
