# Supplementary material for: Associations between Tobacco Smoking and Self-Reported SARS-CoV-2/COVID-19 Infections, Disease Severity, and Duration in the German Population
Source: Atypon-hosted journal article supplement (doi:10.1024/0939-5911/a000858), 2024-04-01
Supplement: 0939-5911_a000858_esm6.pdf [file 0939-5911_a000858_esm6.pdf]

## Electronic Supplementary Material

**ESM 6.** Sensitivity analyses (different outcome definitions<sup>†‡</sup>) of the associations between smoking status and corona infection and corona symptom severity, adjusted for potential confounders

| <b>Smoking status</b>     | <b>Infection<sup>†</sup><br/>yes vs. no infection<br/>aOR (95%CI)<br/>n=14,669</b> | <b>Symptom severity<sup>‡</sup><br/>high vs. low<br/>aOR (95%CI)</b> |
|---------------------------|------------------------------------------------------------------------------------|----------------------------------------------------------------------|
| Current                   | 1.02 (0.68-1.20)                                                                   | 0.37 (0.11-1.18)                                                     |
| Long-term ex-smoking      | 1.03 (0.83-1.28)                                                                   | 0.52 (0.14-1.96)                                                     |
| Never smoking (reference) | 1                                                                                  | 1                                                                    |

*Notes.* aOR = adjusted odds ratio. 95%CI = 95% confidence interval around OR. OR adjusted for: age, sex, migration background, people in household 18+ years, people in household aged <18 years, income, education, region of living, and wave of the survey. <sup>†</sup>Responders “I don’t know if I have ever been tested” excluded. <sup>‡</sup>Symptom severity defined as low = no hospitalisation versus high = hospitalisation (“I had severe symptoms and had to get treatment in a hospital” or “In the hospital I needed intensive care treatment or had to be intubated.”).
