# Supplementary material for: Associations between Tobacco Smoking and Self-Reported SARS-CoV-2/COVID-19 Infections, Disease Severity, and Duration in the German Population
Source: Atypon-hosted journal article supplement (doi:10.1024/0939-5911/a000858), 2024-04-01
Supplement: 0939-5911_a000858_esm7.pdf [file 0939-5911_a000858_esm7.pdf]

## Electronic Supplementary Material

**ESM 7.** Sensitivity analyses (restriction to waves 28-30 in which only a minority of the population had been vaccinated) of the associations between smoking status and corona infection, corona symptom severity, and corona symptom duration, adjusted for potential confounders

| <b>Smoking status</b>     | <b>Infection<br/>yes vs. no infection<br/>aOR (95%CI)<br/>n=5,447</b> | <b>Symptom severity<br/>high vs. low<br/>aOR (95%CI)<br/>n=133</b> | <b>Symptom duration<br/>in months<br/>a<math>\beta</math> (95%CI)<br/>n=90</b> |
|---------------------------|-----------------------------------------------------------------------|--------------------------------------------------------------------|--------------------------------------------------------------------------------|
| Current                   | 0.86 (0.57-1.28)                                                      | 1.82 (0.72-4.62)                                                   | 0.92 (-0.47-2.30)                                                              |
| Long-term ex-smoking      | 0.83 (0.51-1.37)                                                      | 2.34 (0.78-7.04)                                                   | 0.58 (-0.87-2.02)                                                              |
| Never smoking (reference) | 1                                                                     | 1                                                                  | 1                                                                              |

*Notes.* aOR = adjusted odds ratio. a $\beta$  = adjusted  $\beta$ -coefficient of linear regression model. 95%CI = 95% confidence interval around OR or  $\beta$ . OR and  $\beta$  adjusted for: age, sex, migration background, people in household 18+ years, people in household aged <18 years, income, education, region of living, and wave of the survey. The analyses were restricted to respondents to waves 28-30 (waves 31-35 excluded).
