# Supplementary material for: Associations between Tobacco Smoking and Self-Reported SARS-CoV-2/COVID-19 Infections, Disease Severity, and Duration in the German Population
Source: Atypon-hosted journal article supplement (doi:10.1024/0939-5911/a000858), 2024-04-01
Supplement: 0939-5911_a000858_esm8.pdf [file 0939-5911_a000858_esm8.pdf]

## Electronic Supplementary Material

**ESM 8.** Sensitivity analyses (restriction to waves 34-35 in which data on the vaccination status of the respondents were collected) of the associations between smoking status and corona infection, corona symptom severity, and corona symptom duration, adjusted for potential confounders

| <b>Smoking status</b>     | <b>Infection<br/>yes vs. no infection<br/>aOR (95%CI)<br/>n=3,755</b> | <b>Symptom severity<br/>high vs. low<br/>aOR (95%CI)<br/>n=451</b> | <b>Symptom duration<br/>in months<br/>a<math>\beta</math> (95%CI)<br/>n=377</b> |
|---------------------------|-----------------------------------------------------------------------|--------------------------------------------------------------------|---------------------------------------------------------------------------------|
| Current                   | 1.06 (0.84-1.33)                                                      | 0.67 (0.41-1.07)                                                   | -0.09 (-0.46-0.29)                                                              |
| Long-term ex-smoking      | 1.10 (0.81-1.50)                                                      | 0.92 (0.50-1.72)                                                   | -0.12 (-0.64-0.41)                                                              |
| Never smoking (reference) | 1                                                                     | 1                                                                  | 1                                                                               |

*Notes.* aOR = adjusted odds ratio. a $\beta$  = adjusted  $\beta$ -coefficient of linear regression model. 95%CI = 95% confidence interval around OR or  $\beta$ . OR and  $\beta$  adjusted for: age, sex, migration background, people in household 18+ years, people in household aged <18 years, income, education, region of living, SARS-CoV-2 vaccination, and wave of the survey. The analyses were restricted to respondents to waves 34-35 (waves 28-33 excluded).
