# Supplementary material for: Associations between Tobacco Smoking and Self-Reported SARS-CoV-2/COVID-19 Infections, Disease Severity, and Duration in the German Population
Source: Atypon-hosted journal article supplement (doi:10.1024/0939-5911/a000858), 2024-04-01
Supplement: 0939-5911_a000858_esm9.pdf [file 0939-5911_a000858_esm9.pdf]

## Electronic Supplementary Material

**ESM 9.** Post-hoc ancillary sensitivity analysis (including an interaction between smoking status and wave of the survey) of the associations between smoking status and corona infection, adjusted for potential confounders

| <b>Interaction term</b>          | <b>Infection<br/>yes vs. no infection<br/>aOR (95%CI)<br/>n=14,730</b> |
|----------------------------------|------------------------------------------------------------------------|
| Current smoking * wave           | 1.10 (1.01-1.19)                                                       |
| Long-term ex-smoking * wave      | 1.01 (0.91-1.13)                                                       |
| Never smoking * wave (reference) | 1                                                                      |

*Notes.* aOR = adjusted odds ratio. 95%CI = 95% confidence interval around OR. OR adjusted for: age, sex, migration background, people in household 18+ years, people in household aged <18 years, income, education, and region of living. Wave of the survey was used on a metric scale for the interaction with smoking status.
